# Supplementary material for: Analysis of the chromosomal clustering of Fusarium-responsive wheat genes uncovers new players in the defence against head blight disease
Source: PubMed Central journal article supplement (PMC8018971; doi:10.1038/s41598-021-86362-4), 2021-04-02
Supplement: 41598_2021_86362_MOESM1_ESM.pdf [file 41598_2021_86362_MOESM1_ESM.pdf]

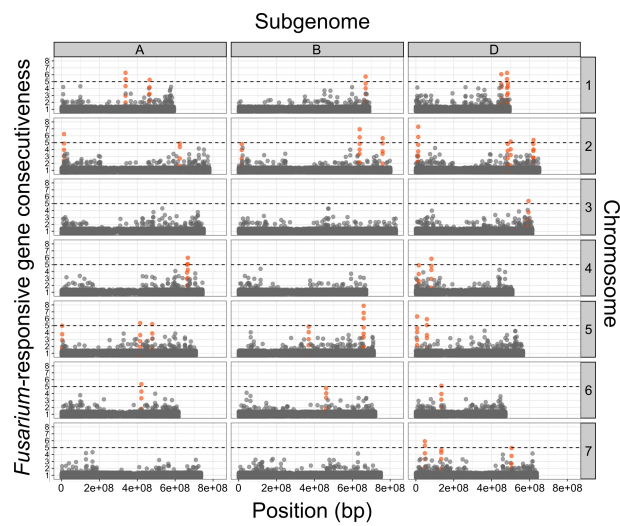

**Figure S1.** The consecutiveness of *Fusarium*-responsive genes along each wheat chromosome. A sliding window of 10 genes was used to screen each chromosome and calculate the *Fusarium*-responsive gene consecutiveness. A significance threshold (dash line) was calculated by 1000 random permutations of the data and enriched *Fusarium*-responsive gene loci (those that passed the threshold) were identified and are represented in red vermillion.
