# Supplementary material for: Analysis of the chromosomal clustering of Fusarium-responsive wheat genes uncovers new players in the defence against head blight disease
Source: PubMed Central journal article supplement (PMC8018971; doi:10.1038/s41598-021-86362-4), 2021-04-02
Supplement: 41598_2021_86362_MOESM2_ESM.pdf [file 41598_2021_86362_MOESM2_ESM.pdf]

FRGC1

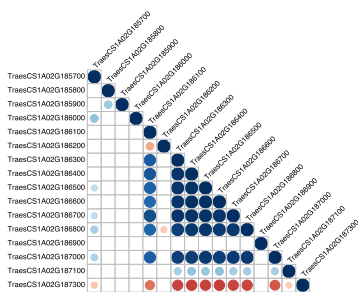

FRGC2

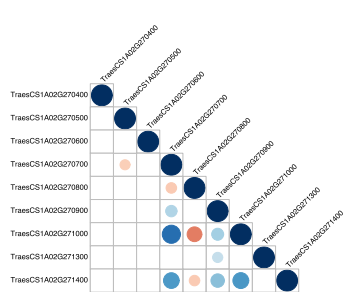

FRGC3

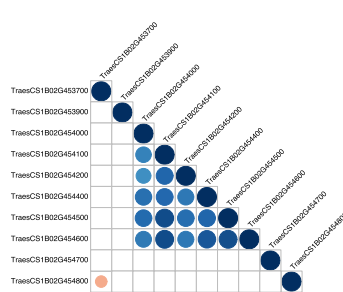

FRGC4

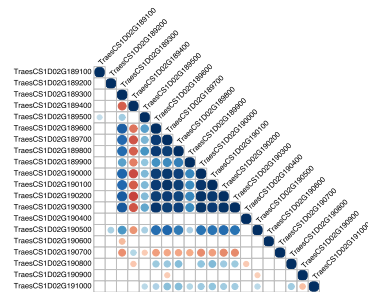

FRGC5

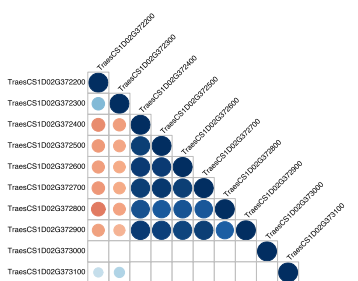

FRGC6

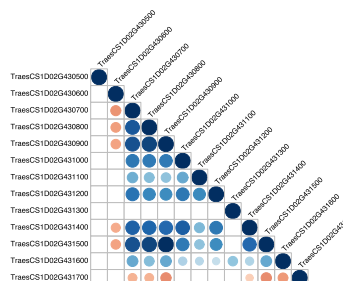

FRGC7

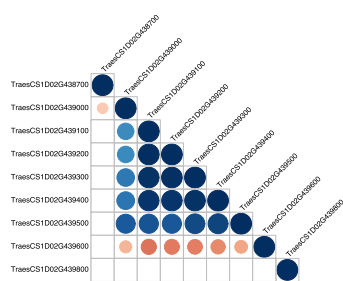

FRGC8

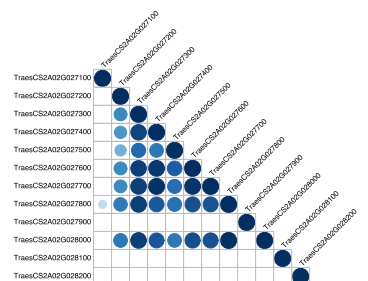

FRGC9

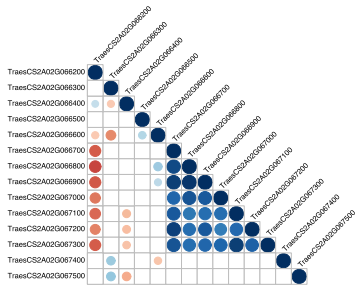

FRGC10

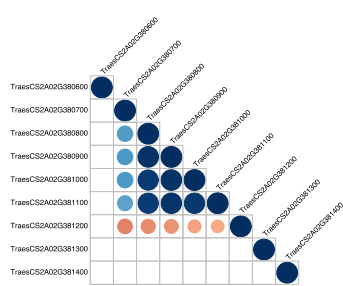

FRGC11

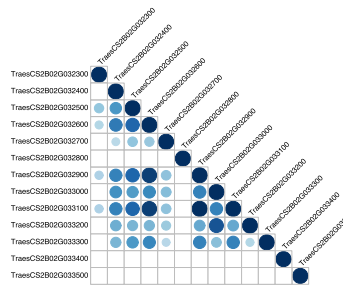

FRGC12

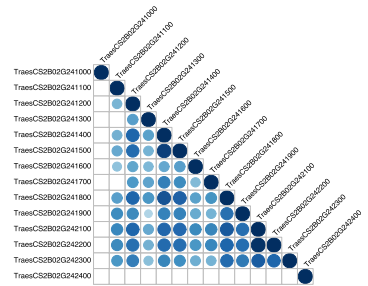

FRGC13

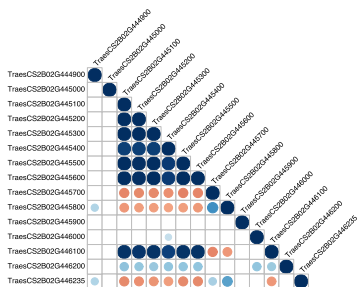

FRGC14

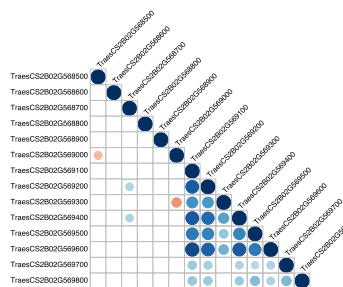

FRGC15

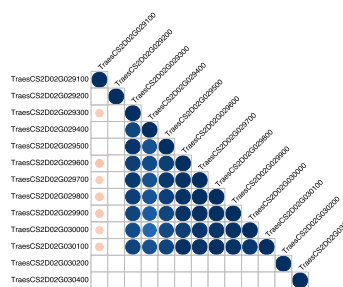

FRGC16

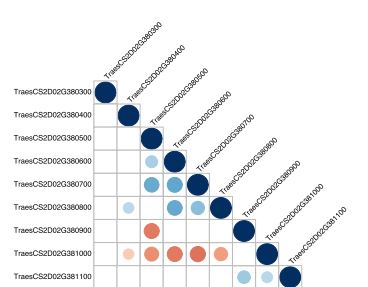

FRGC17

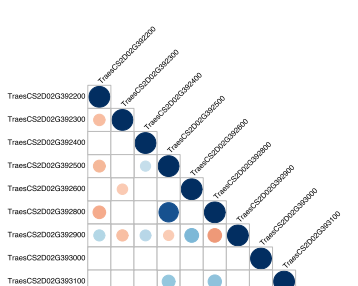

FRGC18

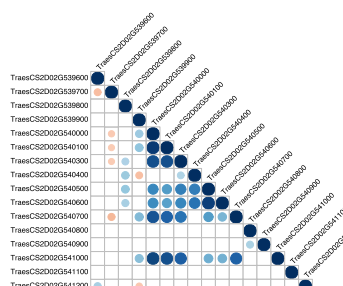

FRGC19

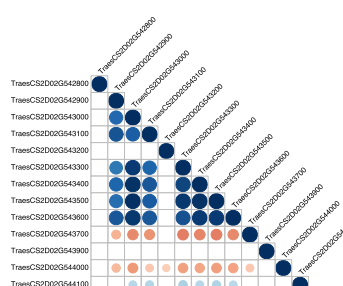

FRGC20

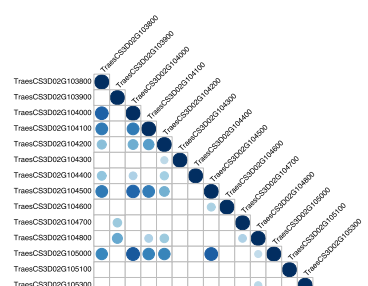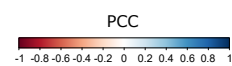

FRGC21

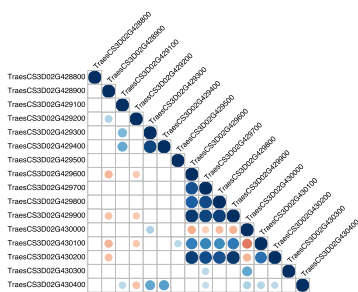

FRGC22

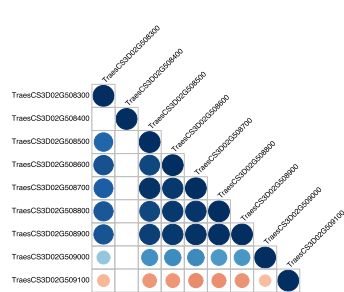

FRGC23

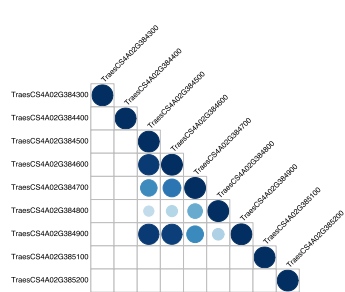

FRGC24

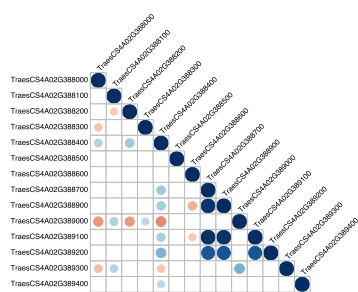

FRGC25

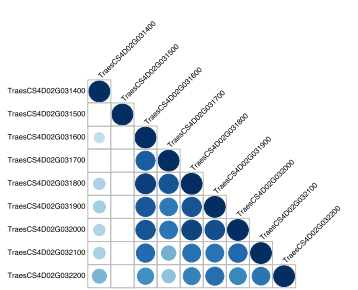

FRGC26

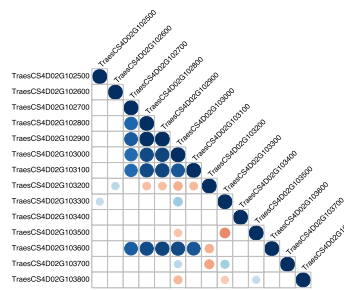

FRGC27

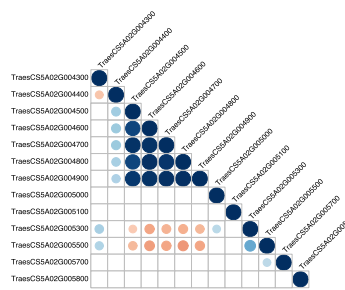

FRGC28

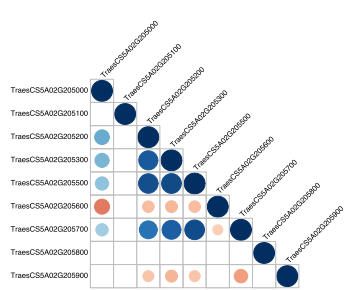

FRGC29

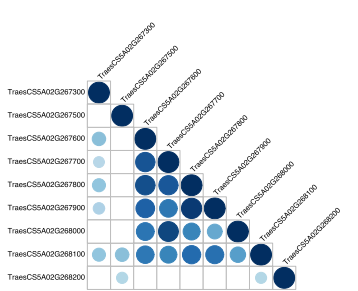

FRGC30

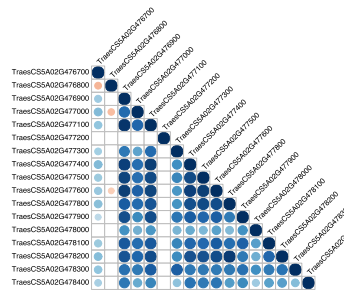

FRGC31

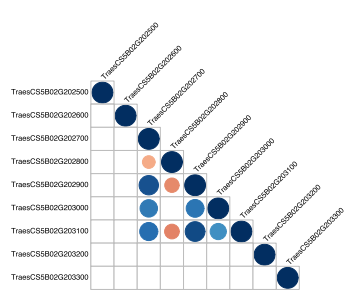

FRGC32

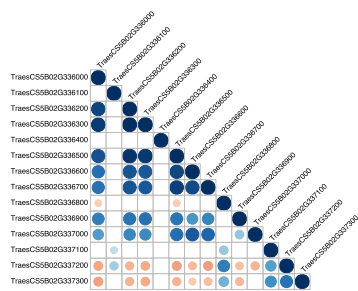

FRGC33

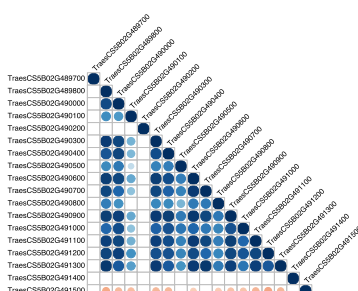

FRGC34

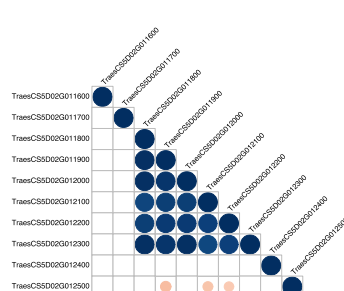

FRGC35

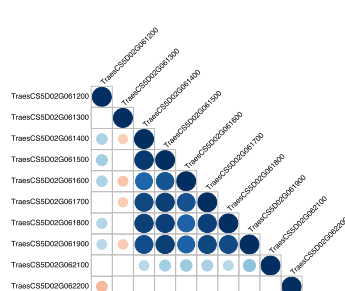

FRGC36

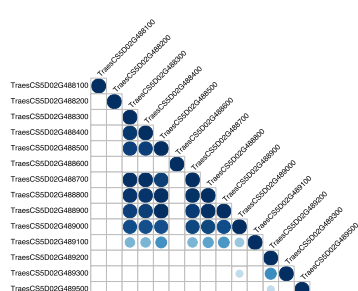

FRGC37

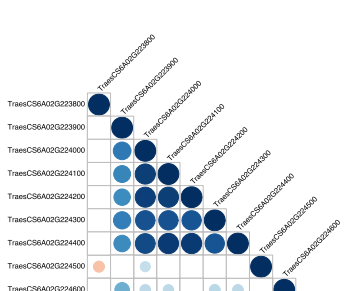

FRGC38

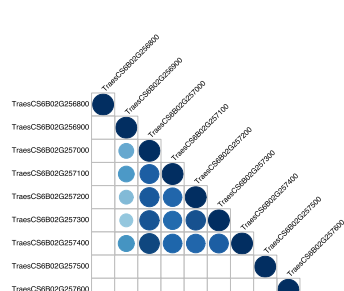

FRGC39

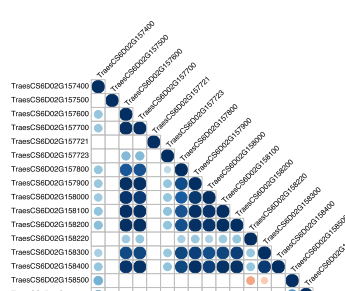

FRGC40

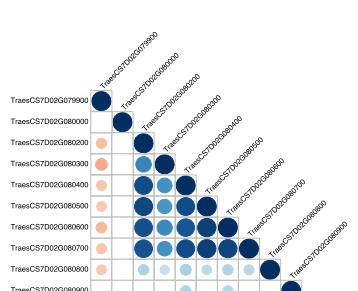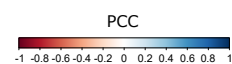

FRGC1

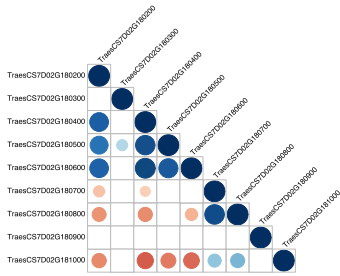

FRGC2

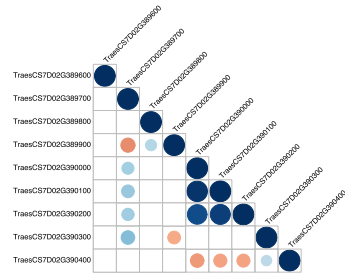

FRGC3

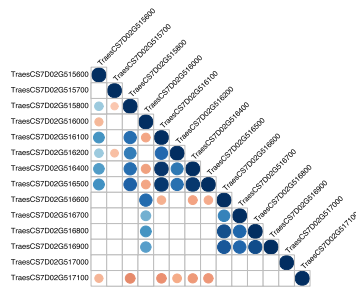

FRGC4

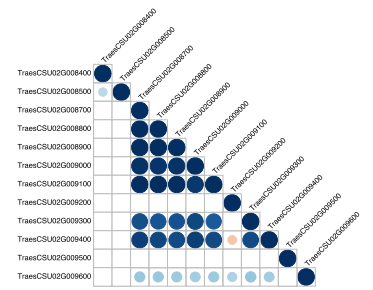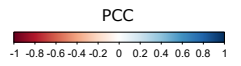

**Figure S2.** Co-expression matrix of FRGC. Expression of clustered genes plus the two neighbouring genes flanking each side of the cluster were used to calculate to generate a co-expression matrix for each FRGC. Circles characteristics represent the direction (colour, blue = positive, red = negative) and the strength (size) of the correlation.
